# Supplementary material
Source: MDPI journal article supplement (https://www.mdpi.com/2410-3888/7/2/63)
Supplement: s1 [file s1]

## Supplementary material

**Table S1.** Genes related to the immune system of NNV-infected European seabass analysed in real-time PCR.

| Gene                                             | Acronym      | Forward and reverse sequence (5' - 3')                     | Annealing temperature (°C) | Efficiency (%) | Reference |
|--------------------------------------------------|--------------|------------------------------------------------------------|----------------------------|----------------|-----------|
| <b>β-actin</b>                                   | <i>actb</i>  | F: TGAACCCCAAAGCCAACAGGGAGA<br>R:GTACGACCAGAGGCATACAGGGACA | 62                         | 108            | [74]      |
| <b>Endogenous Mx Protein</b>                     | <i>MxA</i>   | F: ATTCTGAGTTCTTGCTGAAGG<br>R:CCTCTAGAACTCCACCAGG          | 57                         | 103            | [75]      |
| <b>IFN regulatory factor 3</b>                   | <i>irf3</i>  | F: AGAGGTGAGTGGCAATGGTC<br>R: GAGCAGTTTGAAGCCTTTGG         | 60                         | 111            | [76]      |
| <b>Complement component</b>                      | <i>C3</i>    | F: ACCAAAGAAGTGGCAACCAC<br>R:CTAGCAGTCGGTCAGGGAAC          | 60                         | 102            | [59]      |
| <b>T-cell-specific surface glycoprotein CD28</b> | <i>cd28</i>  | F: TTGCACCCTGAACCCTTAAC<br>R:ACTTCTCCCGTCATGTTTGG          | 60                         | 95             | [64]      |
| <b>Tumour necrosis factor</b>                    | <i>tnfα</i>  | F: CGAGGGCAAGACTTCTTTG<br>R:GCACTGCCTGTTTCAGCTACA          | 60                         | 105            | [14]      |
| <b>Interleukin 1 β</b>                           | <i>Il-1β</i> | F: AGCGACATGGTGCATTCT<br>R: CTCCTCTGCTGTGCTGATGT           | 57                         | 100            | [77]      |

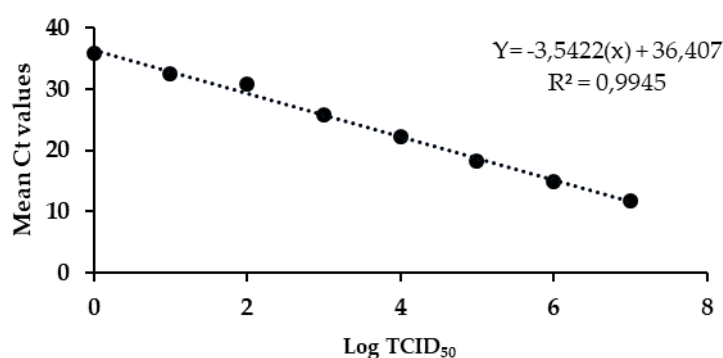

**Figure S1.** Standard curve of the mean Ct value of each of the samples in real-time reverse transcriptase-polymerase chain reaction (RT-qPCR), according to the 10 in 10 dilutions of known NNV TCID<sub>50</sub> concentrations.
